# Supplementary material for: Association Between the Levels of Mouth Rinse Interleukin-1 Beta and Active Matrix Metalloproteinase-8 With Serum C- Reactive Protein in Periodontitis- Associated Systemic Inflammation
Source: Research Square preprint supplement (doi:10.21203/rs.3.rs-7852261/v1), 2025-12-17
Supplement: Supplementary file 1 [file 08554cdabf491f4da2de3f09.docx]

# APPENDIX I

QUESTIONNAIRE

S/NO:

Date

Phone number

SECTION A: PATIENT’S BIODATA

1. Identification Number:
2. Age:
3. Gender: ( Male ) ( Female)
4. Address:
5. Educational Attainment: [Nil] [Primary] [Secondary] [Undergraduate] [ND] [HND] [Graduate] [Postgraduate] [Others]………..
6. Occupation: [Self-employed] [Employed] [Unemployed] [Others]...
7. Religion: [Islam] [Christianity] [Others]..........
8. Socioeconomic status: [Low] [Middle] [High]
9. Marital Status: [Single] [Married] [Divorced]

SECTION B: PRACTICE/BEHAVIOUR

1. Do you practice the following habits?

Smoking [Yes] [Never] [Quit less than 5 years] [Quit greater than 5years] Alcohol consumption [Yes] [No]

1. Have you ever visited a dentist? [Yes] [No] If yes, what treatment did you receive?

Check up Extraction Filling

Cleaning of teeth

Others (Specify)………………………..

1. When do you consider it important to visit the dentist?

[Every six month] [Presence of pain] [Presence of bleeding gums] [Due to loose teeth] [Others] (specify).....................................

1. How often do you visit the dental clinic? [Not at all] [Once a year] [Twice a year] [When necessary] [Others] (specify)……
2. How often do you brush your teeth daily? [Once] [Twice] [More than twice]
3. What do you use in brushing your teeth? [Tooth brush/paste] [Chewing stick/paste] [Chewing stick] [Others] (specify)…….
4. How often do you change your tooth brush? [Every month] [Every 3months] [When necessary] [Others] (specify)…………
5. When food packs in between your teeth, how do you normally remove it? [Use of tooth pick] [Use of broom stick] [Use of sharp pointed objects] [Dental floss] [Others]
6. Probing Pocket Depth (PPD) Baseline

8

7

6

5

4

3

2

1

1

2

3

4

5

6

7

8

8

7

6

5

4

3

2

1

1

2

3

4

5

6

7

8

1. Probing Pocket Depth (PPD) At 3 Months

8

7

6

5

4

3

2

1

1

2

3

4

5

6

7

8

8

7

6

5

4

3

2

1

1

2

3

4

5

6

7

8

1. Clinical Attachment Loss (CAL) Baseline

8

7

6

5

4

3

2

1

1

2

3

4

5

6

7

8

8

7

6

5

4

3

2

1

1

2

3

4

5

6

7

8

1. Clinical Attachment Loss (CAL) At 3 Months

8

7

6

5

4

3

2

1

1

2

3

4

5

6

7

8

8

7

6

5

4

3

2

1

1

2

3

4

5

6

7

8

1. Baseline

Salivary IL-1β Level Salivary aMMP-8 Level Serum CRP Level

1. At 3 Months

Salivary IL-1β Level Salivary aMMP-8 Level Serum CRP Level
